# Supplementary material for: Programmable site-specific delivery of an alkaline phosphatase-activatable prodrug and a mitochondria-targeted cyclopeptide for combination therapy in colon cancer
Source: Royal Society of Chemistry journal article supplement (doi:10.1039/d3bm00834g), 2023-01-01
Supplement: d3bm00834g1.pdf [file d3bm00834g1.pdf]

## Supplementary Material

# Programmable Site-Specific Delivery of Alkaline Phosphatase-Activatable Prodrug and Mitochondria-Targeted Cyclopeptide for Combination Therapy in Colon Cancer

Huachao Chen<sup>‡</sup>, Yongrong Yao<sup>‡</sup>, Xing Zhao, Ninghua Tan\*

*State Key Laboratory of Natural Medicines, School of Traditional Chinese Pharmacy, China Pharmaceutical University, Nanjing 211198, China.*

\*Corresponding author, Ninghua Tan, Email: nhtan@cpu.edu.cn.

### Supplementary figures

1. **Scheme S1.** Synthesis of CPTP.
2. **Fig. S1** <sup>1</sup>H NMR spectrum of CPTP in DMSO.
3. **Fig. S2** <sup>13</sup>C NMR spectrum of CPTP in DMSO.
4. **Fig. S3** <sup>31</sup>P NMR spectrum of CPTP in DMSO.
5. **Fig. S4** MS spectrum of CPTP.
6. **Fig. S5** Long-term-stability study of the size of CPTP/RA-HALipo in PBS or DMEM with 10% FBS.
7. **Fig. S6** GSH depletion rate of CPTP/RA-HALipo, RA-S-S-Cy, and empty HALipo, calculated from the GSH/GSSG assay kit (n = 3).
8. **Fig. S7** Co-localization images of CPTP/RA-HALipo in cells.
9. **Fig. S8** Quantitative analysis of fluorescence intensity of tumor regions in Fig. 8.
10. **Fig. S9** Body weight variation of tumour-bearing mice during treatment.
11. **Fig. S10** H&E stained images of tissue sections from different organs of mice after CPTP/RA-HALipo treatment and the age-matched healthy mice without treatment (control).
12. **Fig. S11** Biochemical indexes analysis of aspartate aminotransferase (AST), alanine aminotransferase (ALT), creatinine (CREA) and blood urea nitrogen (BUN) of the mice after various treatments. All error bars present as mean±SD (n=6).
13. **Table. S1** The routine blood tests with mice after CPTP/RA-HALipo treatment and the age-matched mice without treatment (control).

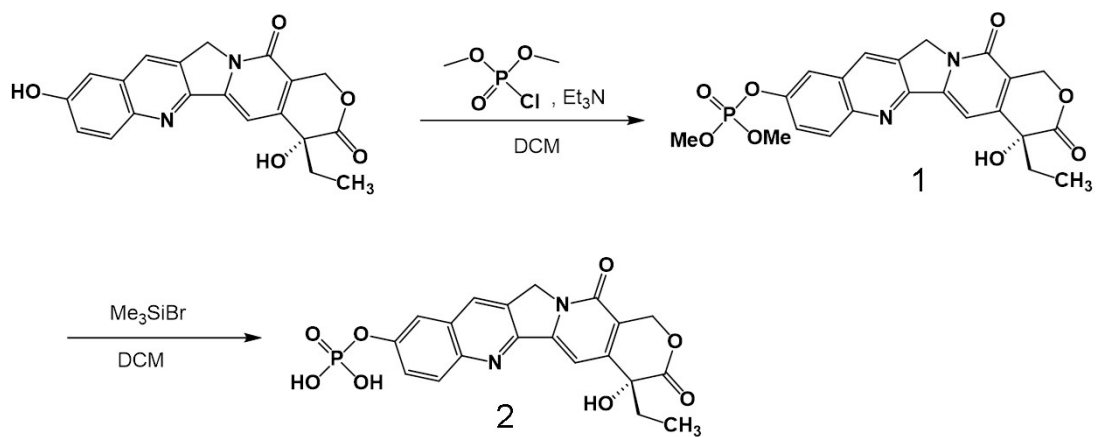

**Scheme S1** Synthesis of CPTP.

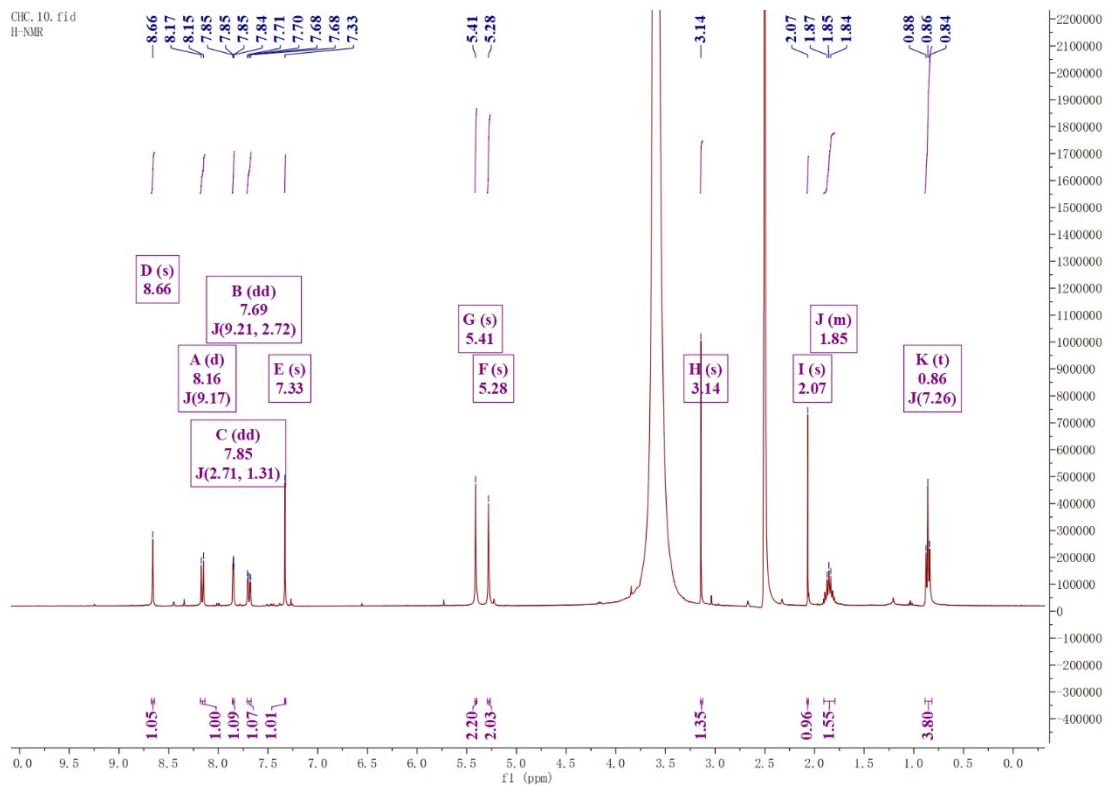

Fig. S1  $^1\text{H}$  NMR spectrum of CPTP in DMSO.

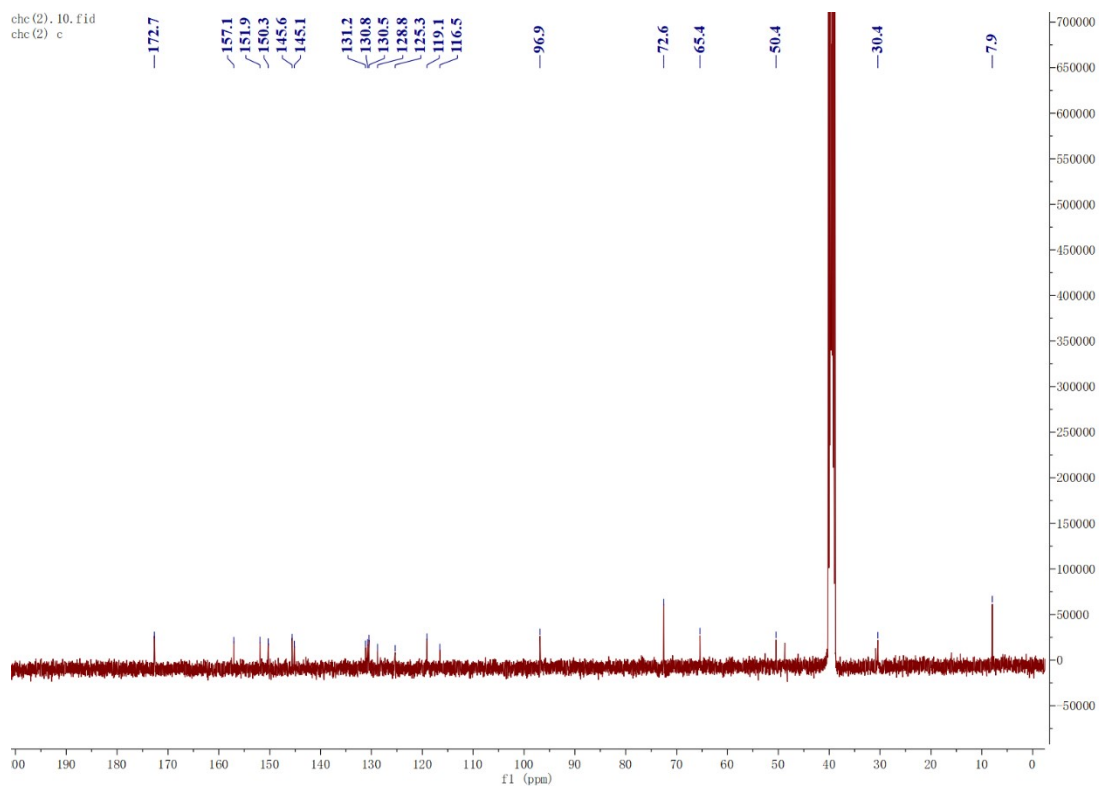

Fig. S2  $^{13}\text{C}$  NMR spectrum of CPTP in DMSO.

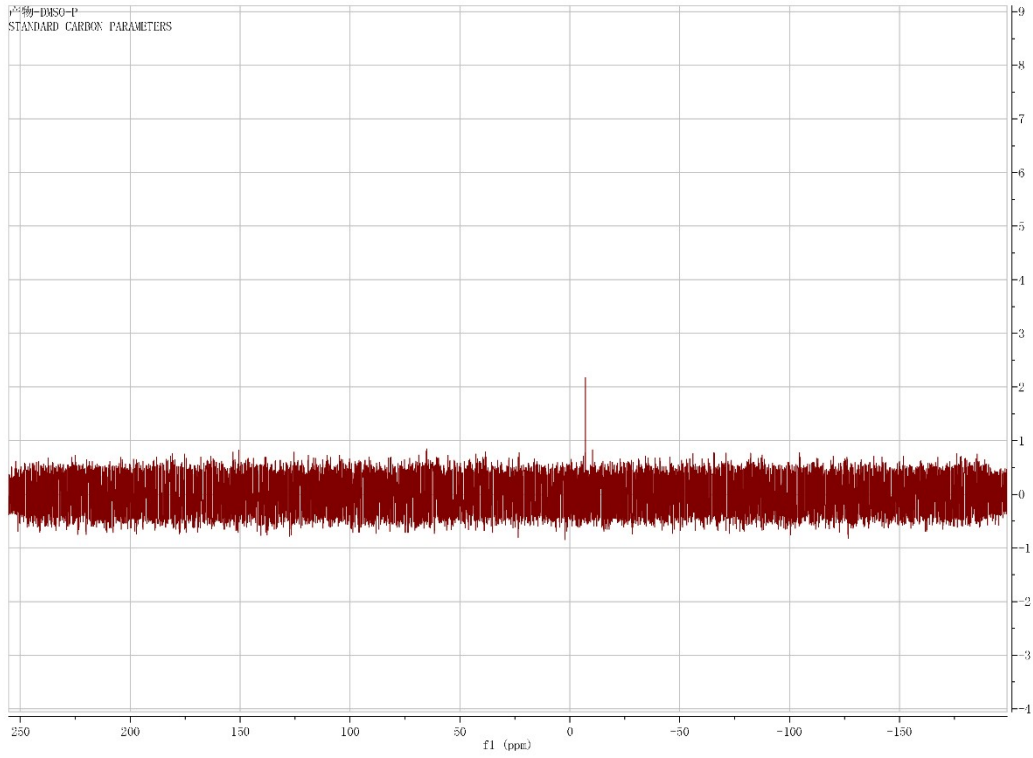

**Fig. S3**  $^{31}\text{P}$  NMR spectrum of CPTP in DMSO.

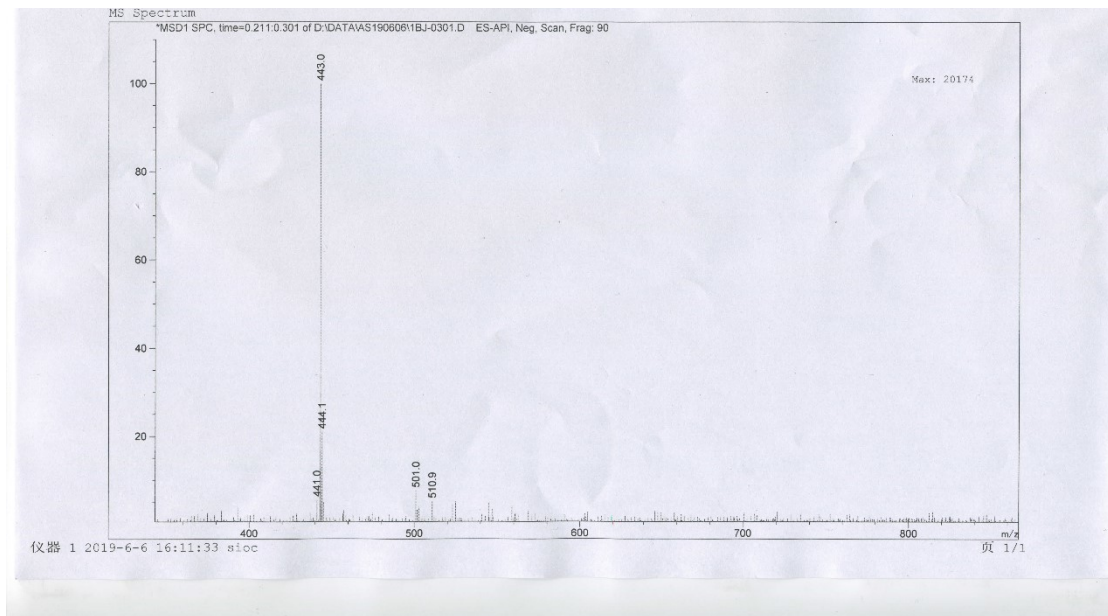

**Fig. S4** MS spectrum of CPTP.

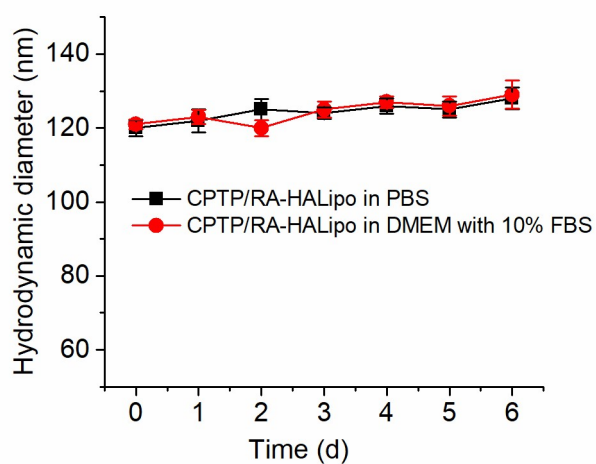

**Fig. S5** Long-term-stability study of the size of CPTP/RA-HALipo in PBS or DMEM with 10% FBS.

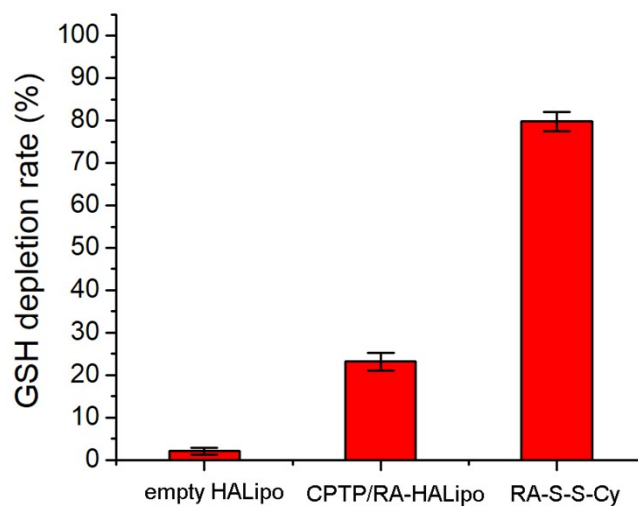

**Fig. S6** GSH depletion rate of CPTP/RA-HALipo, RA-S-S-Cy, and empty HALipo, calculated from the GSH/GSSG assay kit (n = 3).

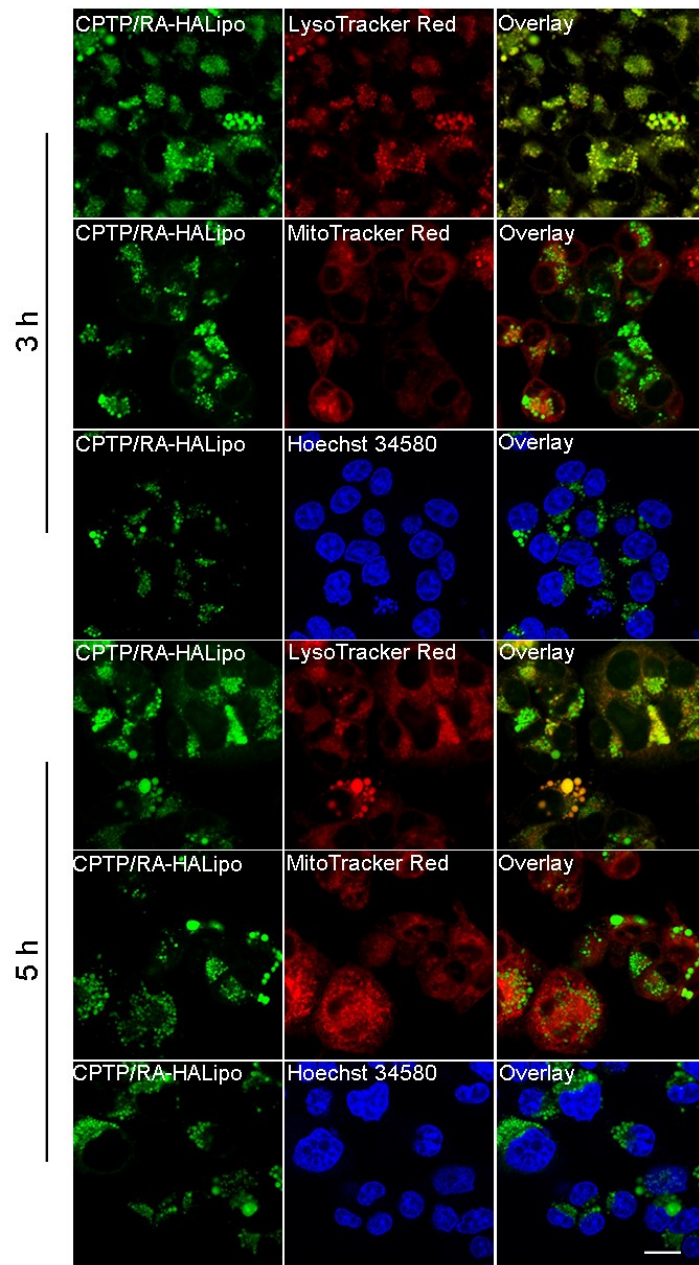

**Fig. S7** Co-localization images of CPTP/RA-HALipo in cells. Caco-2 cells were incubated with CPTP/RA-HALipo at 37 °C for 3 h or 5 h, and then incubated with 100 nM LysoTracker Red, Hoechst 34580 and MitoTracker Red 10 min. Scale bar: 20  $\mu$ m.

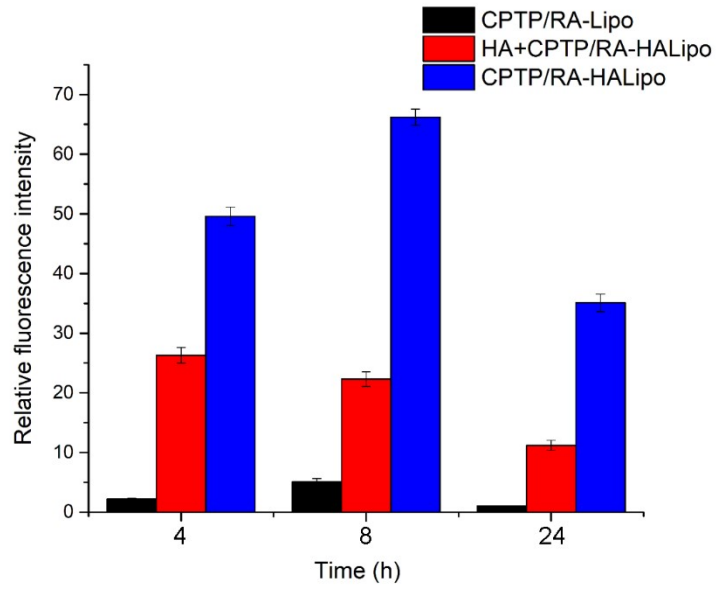

**Fig. S8** Quantitative analysis of fluorescence intensity of tumor regions in Fig. 8.

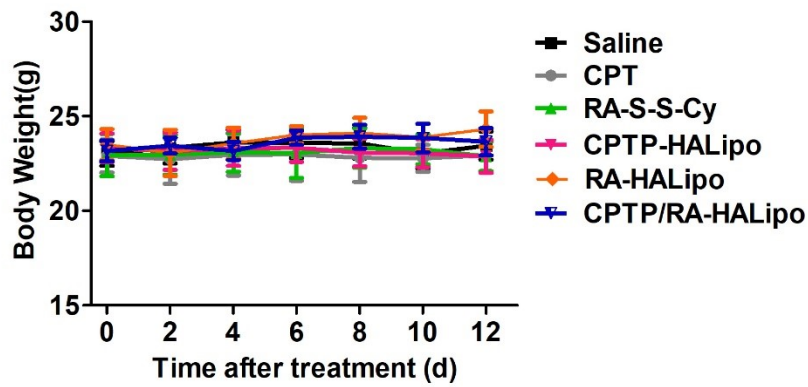

**Fig. S9** Body weight variation of tumour-bearing mice during treatment.

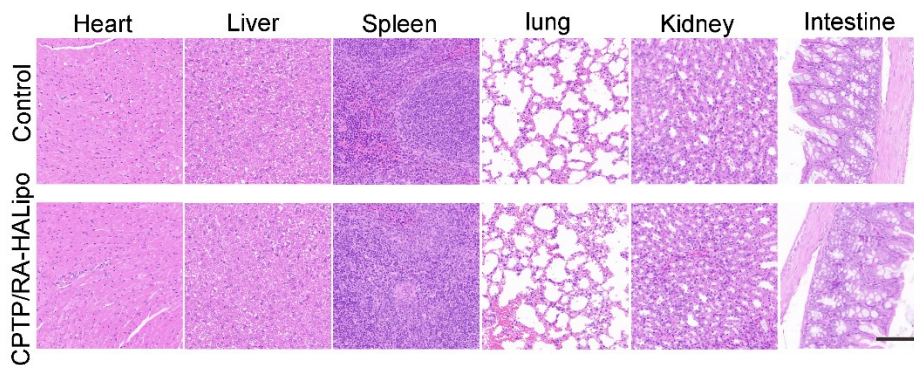

**Fig. S10** H&E stained images of tissue sections from different organs of mice after CPTP/RA-HALipo treatment and the age-matched healthy mice without treatment (control).

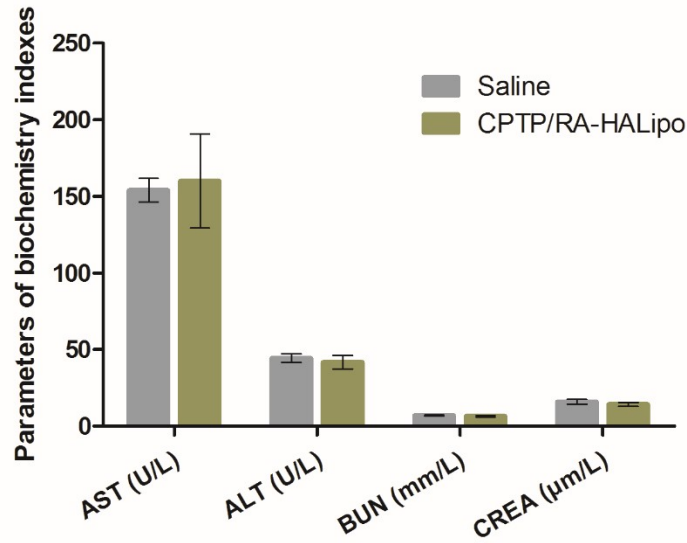

**Fig. S11** Biochemical indexes analysis of aspartate aminotransferase (AST), alanine aminotransferase (ALT), creatinine (CREA) and blood urea nitrogen (BUN) of the mice after various treatments. All error bars present as mean±SD (n=6).

| Parameters          | Control        | CPTP/RA-HALipo |
|---------------------|----------------|----------------|
| WBC ( $10^9/L$ )    | 9.36 ± 1.92    | 7.51 ± 2.29    |
| RBC ( $10^{12}/L$ ) | 10.6 ± 0.48    | 10.48 ± 0.2    |
| HGB (g/dL)          | 14.89 ± 0.56   | 14.97 ± 0.57   |
| HCT (%)             | 48.3 ± 2.13    | 48.03 ± 1.65   |
| MCV (fL)            | 45.57 ± 0.58   | 45.83 ± 1.48   |
| MCH (pg)            | 14.04 ± 0.28   | 14.27 ± 0.53   |
| MCHC (g/dL)         | 30.81 ± 0.58   | 31.11 ± 0.27   |
| PLT ( $10^9/L$ )    | 663.29 ± 61.47 | 620.86 ± 27.97 |
| NEU (%)             | 14.37 ± 2.52   | 11.03 ± 4.73   |
| LYM (%)             | 73.13 ± 7.17   | 71.74 ± 4.42   |
| MONO (%)            | 1.34 ± 0.45    | 1.43 ± 0.42    |
| EOS (%)             | 4.21 ± 0.93    | 6.9 ± 3.82     |
| BASO (%)            | 0.33 ± 0.08    | 0.37 ± 0.11    |
| NEUT ( $10^9/L$ )   | 1.37 ± 0.48    | 0.91 ± 0.5     |
| LYMP ( $10^9/L$ )   | 6.35 ± 1.29    | 4.75 ± 1.79    |
| MONO ( $10^9/L$ )   | 0.12 ± 0.07    | 0.07 ± 0.04    |
| EOS ( $10^9/L$ )    | 0.39 ± 0.13    | 0.61 ± 0.25    |
| BASO ( $10^9/L$ )   | 0.03 ± 0.01    | 0.03 ± 0.01    |



|             |              |              |
|-------------|--------------|--------------|
| CHCM (g/dL) | 31.21 ± 0.72 | 31.26 ± 0.21 |
|-------------|--------------|--------------|

---

**Table. S1** The routine blood tests with mice after CPTP/RA-HALipo treatment and the age-matched mice without treatment (control).
